# Supplementary material
Source: PubMed Central journal article supplement (PMC140931)
Supplement: pnas_262668999_2.pdf [file pnas_262668999_2.pdf]

| gene           | pep  | sequence   | %CD8+         | gene        | pep  | sequence   | %CD8+ |
|----------------|------|------------|---------------|-------------|------|------------|-------|
| <b>D8L</b>     | # 1  | IIAIVFVFIL | 0.01          | <b>A27L</b> | # 1  | TLFPGDDDL  | 0.01  |
|                | # 2  | YLDNLLPSTL | 0.01          |             | # 2  | NLEKKITNV  | 0.00  |
|                | # 3  | FILTAILFL  | 0.01          |             | # 3  | TLKQRLTNL  | 0.00  |
|                | # 4  | YLDNLLPST  | 0.02          |             | # 4  | TLRAAMISL  | 0.02  |
|                | # 5  | GLIIISIFL  | 0.00          |             | # 5  | AMISLAKKI  | 0.02  |
|                | # 6  | IIISIFLQV  | 0.01          |             |      |            |       |
|                | # 7  | FAIIAIVFV  | 0.03          |             |      |            |       |
| <b>A10L</b>    | # 1  | YLFRIVSTV  | 0.01          | <b>E3L</b>  | # 1  | AMADVIIDDV | 0.04  |
|                | # 2  | LLNNSLGSV  | 0.02          |             | # 2  | IVCEAIKTI  | 0.00  |
|                | # 3  | NLATSITYI  | 0.03          |             | # 3  | ALYDLQRSA  | 0.00  |
|                | # 4  | DLLNFMVSV  | 0.04          |             | # 4  | AAKLAVDKL  | 0.00  |
|                | # 5  | LIRPKILSM  | 0.00          |             | # 5  | AVDKLLGYV  | 0.01  |
|                | # 6  | ILLNNSLGSV | 0.03          |             | # 6  | YIDERSNAEI | 0.00  |
|                | # 7  | YLIDTTSREL | 0.00          |             | # 7  | QLNMEKREV  | 0.02  |
|                | # 8  | MLVSQALNSV | 0.03          |             |      |            |       |
|                | # 9  | MMPIKSIVTL | 0.02          |             |      |            |       |
|                | # 10 | SLIRPKILSM | 0.01          |             |      |            |       |
| <b>H3L</b>     | # 1  | SLSAYIIRV  | 0.37 / 0.68 * | <b>K1L</b>  | # 1  | LLFIPDIKL  | 0.00  |
|                | # 2  | IMFMLIFNV  | 0.01          |             | # 2  | VMLNDVSIV  | 0.02  |
|                | # 3  | YIIRVTAL   | 0.00          |             | # 3  | ILLSCIHTT  | 0.02  |
|                | # 4  | NVIGLIVIL  | 0.01          |             | # 4  | AIADNNVRL  | 0.01  |
|                | # 5  | YTGGYDVSL  | 0.00          |             | # 5  | DLAILLSCI  | 0.02  |
|                | # 6  | GLFDINVIGL | 0.03          |             |      |            |       |
|                | # 7  | AMHDKKIDIL | 0.07          |             |      |            |       |
| <b>H6R/H7R</b> | # 1  | RLYKPLLKL  | 0.01          | <b>C7L</b>  | # 1  | VIYEAVIHL  | 0.02  |
|                | # 2  | ALFYKDGKL  | 0.01          |             | # 2  | IIINGDIAL  | 0.00  |
|                | # 3  | FLSIVVDHV  | 0.01          |             | # 3  | NMISKKYKV  | 0.00  |
|                | # 4  | RIFVRVYNV  | 0.03          |             |      |            |       |
|                | # 5  | LTIKQTAEV  | 0.00          |             |      |            |       |
|                | # 6  | FLYNFWTNV  | 0.00          |             |      |            |       |
| <b>ctrl</b>    | hTyr | YMDGTMSQV  | 0.01          | <b>ctrl</b> | IgG1 | isotype    | 0.00  |
