# Supplementary material
Source: PubMed Central journal article supplement (PMC140931)

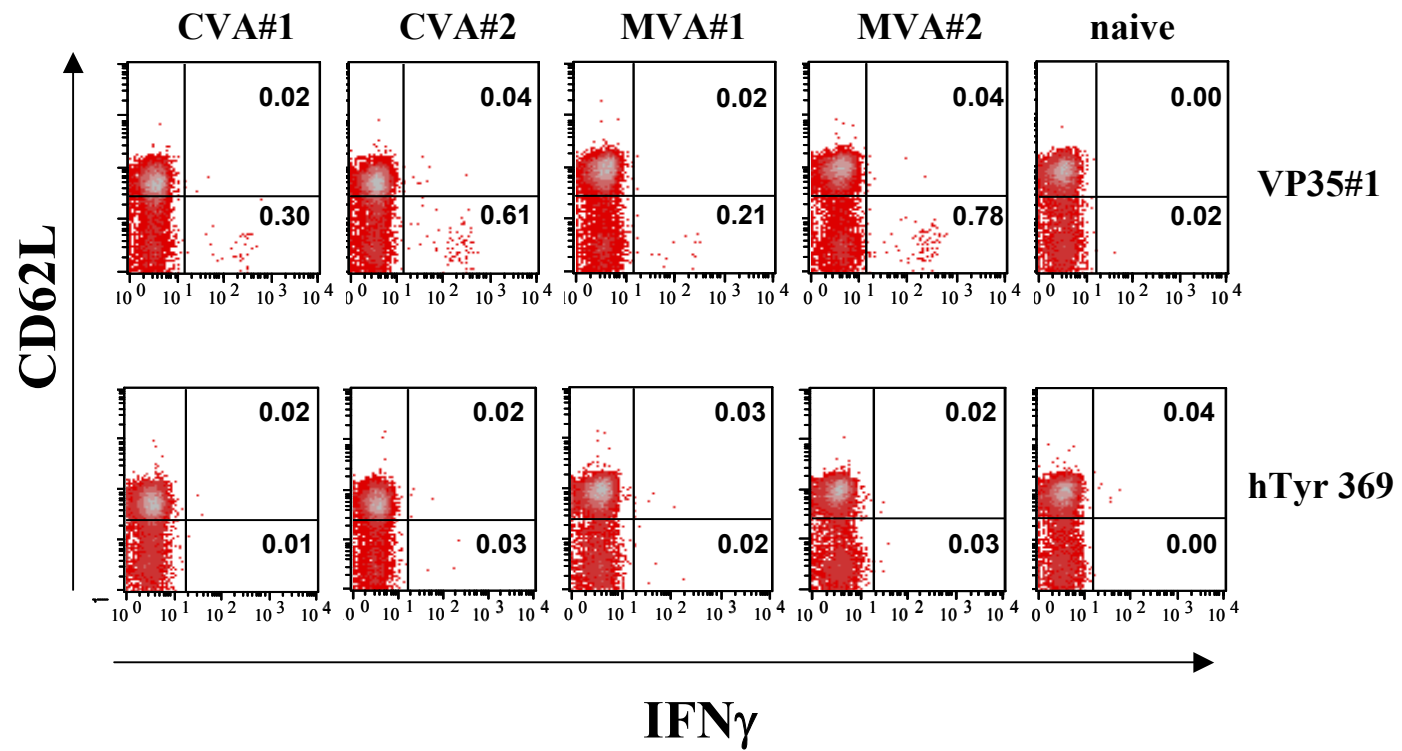

Supplement: pnas_262668999_4.pdf [file pnas_262668999_4.pdf]

**A****MVA**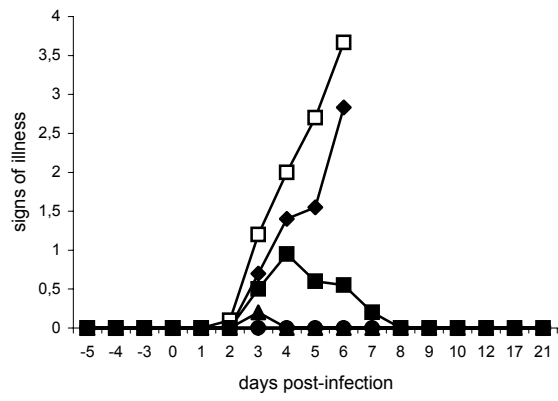**B****Wyeth**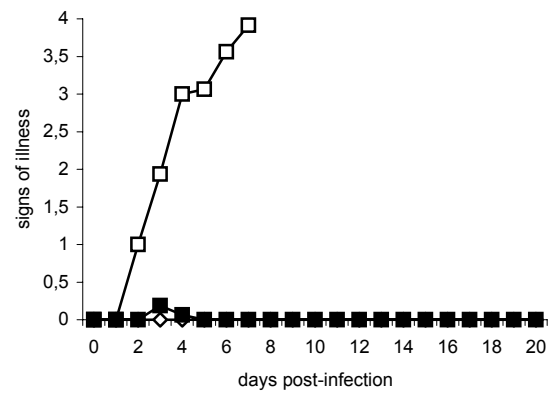

Supplement: pnas_262668999_6.pdf [file pnas_262668999_6.pdf]

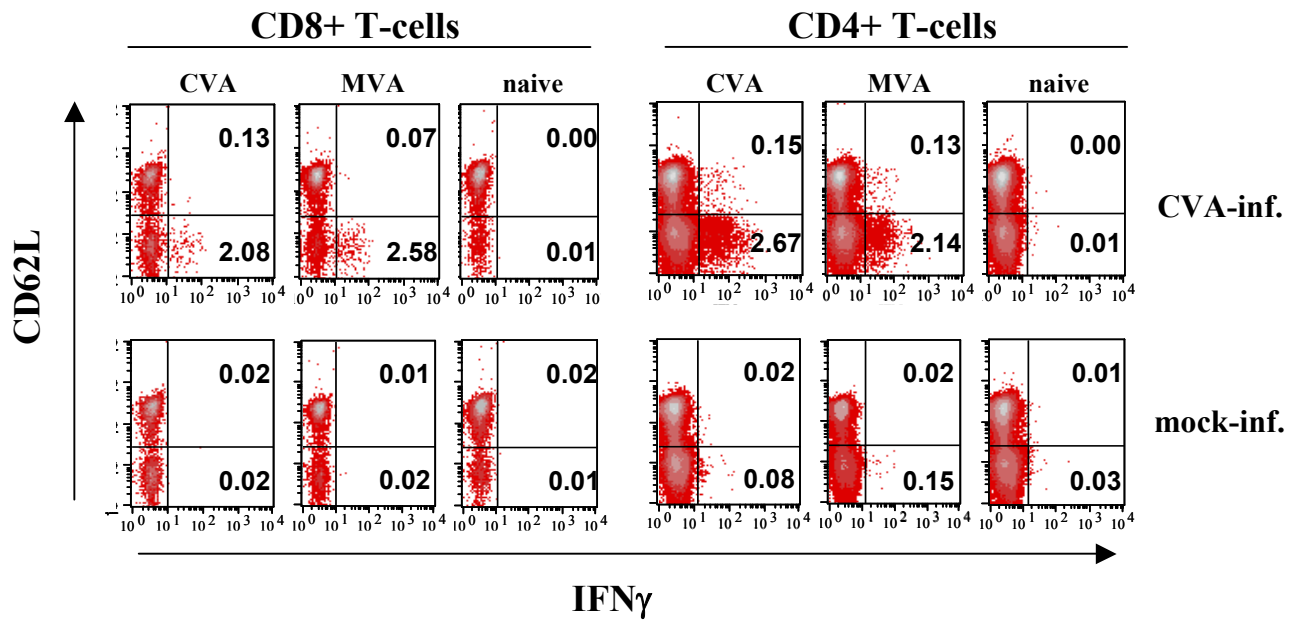

Supplement: pnas_262668999_8.pdf [file pnas_262668999_8.pdf]
